# Supplementary material for: Discovering the genes mediating the interactions between chronic respiratory diseases in the human interactome
Source: PubMed Central journal article supplement (PMC7010776; doi:10.1038/s41467-020-14600-w), 2020-02-10
Supplement: 41467_2020_14600_MOESM3_ESM.pdf [file 41467_2020_14600_MOESM3_ESM.pdf]

## **Description of Additional Supplementary Files**

File Name: Supplementary Data 1

Description: Asthma seed genes and respective sources

File Name: Supplementary Data 2

Description: COPD seed genes and respective sources

File Name: Supplementary Data 3

Description: Overlapping genes between the asthma and COPD disease modules

File Name: Supplementary Data 4

Description: Flow centrality of genes when considering the asthma module as source and the COPD module as target

File Name: Supplementary Data 5

Description: List of related disease pairs extracted from DisGeNet

File Name: Supplementary Data 6

Description: List of GEO datasets considered in the analysis and their characteristics
